1     **Stable Genetic Transformation and Heterologous Expression in the Nitrogen-fixing**  
2                                     **Plant Endosymbiont *Frankia alni* ACN14a**

3             **Isaac Gifford<sup>a#</sup>, Summer Vance<sup>a</sup>, Giang Nguyen<sup>a</sup>, and Alison M Berry<sup>a</sup>**

4     **Author affiliations: <sup>a</sup>Department of Plant Sciences, University of California, Davis,**  
5                                     **Davis, CA, United States**

6     #Address correspondence to Isaac Gifford, [isgifford@ucdavis.edu](mailto:isgifford@ucdavis.edu)

7     **Running Title: Genetic Transformation of *Frankia alni***

8     Word Counts:

9             Abstract: 221 words

10            Importance: 123 words

11            Text Body: 5315 words

12     **Abstract**

13            Genus *Frankia* is comprised primarily of nitrogen-fixing actinobacteria that form  
14     root nodule symbioses with a group of hosts known as the actinorhizal plants. These  
15     plants are evolutionarily closely related to the legumes, which are nodulated by the  
16     rhizobia. Both host groups utilize homologs of nodulation genes for root-nodule  
17     symbiosis, derived from common plant ancestors. However the corresponding  
18     endosymbionts, *Frankia* and the rhizobia, are distantly related groups of bacteria, leading  
19     to questions of their symbiotic mechanisms and evolutionary history. To date, a stable  
20     system of genetic transformation has been lacking in *Frankia*. Here, we report the

21 successful electrotransformation of *Frankia alni* ACN14a, by means of replicating  
22 plasmids expressing chloramphenicol-resistance for selection, and the use of GFP as a  
23 marker of gene expression. We have identified type IV methyl-directed restriction  
24 systems, highly-expressed in a range of actinobacteria, as a likely barrier to *Frankia*  
25 transformation and circumvented this barrier by using unmethylated plasmids, which  
26 allowed the transformation of *F. alni* as well as the maintenance of the plasmid. During  
27 nitrogen limitation, *Frankia* differentiates into two cell types: the vegetative hyphae and  
28 nitrogen-fixing vesicles. When the plasmid transformation system was used with  
29 expression of *egfp* under the control of the *nif* gene cluster promoter, it was possible to  
30 demonstrate by fluorescence imaging the expression of nitrogen fixation in vesicles but  
31 not hyphae in nitrogen-limited culture.

## 32 **Importance**

33 To date, the study of *Frankia*-actinorhizal symbioses has been complicated by the  
34 lack of genetic tools for manipulation of *Frankia*, especially stable genetic transformation.  
35 The transformation system reported here, particularly coupled with marker genes, can be  
36 used to differentiate patterns of gene expression between *Frankia* hyphae and vesicles in  
37 symbiosis or in free-living conditions. This will enable deeper comparisons between  
38 *Frankia*-actinorhizal symbioses and rhizobia-legume symbioses in terms of molecular  
39 signaling and metabolic exchange that will broaden understanding of the evolution of  
40 these symbioses and potentially make possible their application in agriculture. The  
41 development of transformation methods will allow further down-stream applications  
42 including gene knock-outs and complementation that will, in turn, open up a much  
43 broader range of experiments into *Frankia* and its symbioses.

## 44 **Introduction**

45 Bacteria in the genus *Frankia* form nitrogen-fixing root nodule symbioses with a  
46 group of host plants, the actinorhizal plants. The actinorhizal plants are evolutionarily  
47 closely related to the legumes within the Nitrogen-fixing Clade (NFC; Soltis *et al.*, 1995).  
48 The bacterial symbionts are only distantly related however: *Frankia* belongs to the  
49 phylum Actinobacteria, comprised of high-GC-content gram-positive bacteria, whereas  
50 the rhizobia, symbionts of the legumes, are gram-negative proteobacteria. Additionally,  
51 *Frankia* is a multicellular, hyphal genus whereas the rhizobia are single-celled. In most of  
52 the actinorhizal symbioses, and in nitrogen-limiting conditions *in vitro*, *Frankia*  
53 differentiates into two cell types: vegetative hyphae and nitrogen-fixing vesicles. Vesicles  
54 are surrounded by a lamellar hopanoid lipid envelope (Berry *et al.*, 1993) that increases in  
55 number of layers in response to oxygen tension thereby likely reducing the flow of  
56 oxygen into the vesicle interior to protect the nitrogenase complex from deactivation  
57 (Benson and Silvester, 1993). Thus, unlike the rhizobia which require their hosts to  
58 regulate the flow of oxygen for nitrogen fixation in symbiosis (Appleby, 1984), *Frankia*  
59 vesicles are capable of fixing nitrogen in atmospheric oxygen conditions (Benson and  
60 Silvester, 1993).

61 Biological nitrogen fixation has potential applications in the development of  
62 minimal input strategies for more sustainable agriculture globally and in nutrient-  
63 deficient soils through genetic improvement of crops (Gutierrez, 2012). In efforts to  
64 understand the mechanisms of root nodule symbioses, phylogenetic studies of the  
65 Nitrogen-Fixing Clade have shown a shared predisposition underlying the evolution root  
66 nodule symbioses between the actinorhizal plants and legumes (Werner *et al.*, 2014;

67 Battenberg *et al.*, 2018). The actinorhizal and legume hosts share the Common Symbiotic  
68 Pathway, a signaling pathway that leads to the development of the nodule in response to  
69 the symbiont (reviewed in Oldroyd 2013) as well as several key gene orthologs in the  
70 process of nodule development (Battenberg *et al.*, 2018; Griesmann *et al.*, 2018). Clear  
71 differences also exist in the genetics of nodulation in the two bacterial groups, leaving  
72 major questions concerning the evolution and development of root-nodule symbioses in  
73 the bacterial partners. The rhizobial signaling molecules that trigger nodulation in many  
74 of the legume hosts, called Nod factors, are synthesized by *nod* genes and have been  
75 extensively studied (Oldroyd, 2013). The majority of *Frankia* genomes do not contain  
76 clear sets of *nod* gene homologs with the exception of several of the cluster II *Frankia*:  
77 genomes of these *Frankia* contain homologs of the rhizobial *nodABC* genes that are  
78 expressed in symbiosis (Persson *et al.*, 2015). Other mechanisms have been found to  
79 trigger legume nodulation by rhizobia, including an effector protein injected into the host  
80 by a type III secretion system (Okazaki *et al.*, 2013); however genes responsible for these  
81 pathways lack homologs in *Frankia* genomes as well. Signals from *Frankia* in clusters I  
82 and III that elicit host root responses have been detected experimentally, but the chemical  
83 composition has not been defined (Ceremonie *et al.*, 1999; Cissoko *et al.*, 2018).

84         The major advances in knowledge of rhizobial symbioses have been made  
85 possible by the development of genetic tools for dissecting the metabolic and regulatory  
86 pathways in the microsymbiont-host interactions. Long *et al.* (1982) originally  
87 demonstrated the role of the *nod* genes in symbiosis by complementing nodulation-  
88 deficient mutants of *Sinorhizobium meliloti* with *nod* genes encoded on a replicating,  
89 broad host-range, plasmid. More recently, expression of marker genes in rhizobia has

90 enabled a wider-range of experiments including the tracking of microsymbionts during  
91 the host infection process (Gage, 2002) and the identification of regulatory networks  
92 involved in symbiotic interactions (Spaepen *et al.*, 2009). However, to date, there has  
93 been no stable genetic transformation system for *Frankia* (Kucho *et al.*, 2009). As  
94 reported here, a transformation system in *Frankia* will thus enable functional inquiries  
95 into the diverse mechanisms involved in establishing root-nodule symbiosis and  
96 maintaining biological nitrogen fixation in actinorhizal symbioses. These inquiries will,  
97 in turn, contribute to a wider understanding of the origins of root nodule symbioses and  
98 mechanisms of *Frankia* and rhizobia interaction with hosts in the NFC.

99 *Frankia* has several barriers to transformation. Actinobacteria in general have low  
100 rates of homologous recombination due to competition between their homologous  
101 recombination pathway and a Non-Homologous End-Joining pathway (Zhang *et al.*,  
102 2012). Additionally, natural vectors for *Frankia* transformation are limited as no *Frankia*  
103 phages have been discovered (Simonet *et al.*, 1990). Finally, its multi-cellular hyphae  
104 require that all cells be transformed in order for experiments to be viable. Despite these  
105 barriers, it has been demonstrated that DNA can be electroporated into *Frankia* cells  
106 (Myers and Tisa, 2004), providing a potential avenue for genetic transformation.  
107 Furthermore, Kucho *et al.* (2009) reported initial success in integrating a non-replicating  
108 plasmid into the chromosome of *Frankia* sp. CcI3. However the recombined plasmid was  
109 lost in the following generation, limiting its use in experiments.

110 Restriction enzymes pose a barrier to successful transformation in bacteria due to  
111 their role in defense by digesting foreign DNA. In some actinobacteria, the use of  
112 unmethylated plasmids has increased transformation efficiency (Ankri *et al.*, 1996; Molle

113 *et al.*, 1999), potentially due to the presence of Type IV methyl-directed restriction  
114 enzymes. In the majority of bacterial taxa, DNA is methylated during replication by the  
115 methyltransferase Dam to mark parent strands for DNA repair and excision of  
116 misincorporated bases from the daughter strand (Sanchez-Romero *et al.*, 2015). The  
117 majority of actinobacteria, however, lack *dam* homologs (Sanchez-Romero *et al.*, 2015)  
118 and an investigation of genomes of *Streptomyces*, *Rhodococcus*, and *Micromonospora*  
119 spp. found that these genomes were not methylated in the canonical Dam pattern  
120 (Novella *et al.*, 1996). While actinobacteria have recently been shown to have a unique  
121 mismatch repair pathway (Castaneda-Garcia *et al.*, 2017) it is not yet known how this  
122 pathway utilizes methylation, if at all.

123         In this study we report successful genetic transformation of *Frankia alni* ACN14a  
124 by using an unmethylated plasmid to circumvent methylation-targeting restriction  
125 enzymes encoded in the ACN14a genome. This permitted the maintenance of plasmids  
126 derived from one with a very broad host-range origin of replication (Kurenbach *et al.*,  
127 2003) in *F. alni* cultures. Additionally, we show that *gfp* expressed from a replicating  
128 plasmid can be used to label gene expression differences between *Frankia* cell types  
129 during nitrogen fixation, opening up molecular genetics-based experiments on *Frankia*  
130 symbioses in the future.

## 131 **Results**

### 132 *Identification of Restriction Enzymes in Frankia and Transcriptome Analysis*

133         Type I, II and IV restriction enzymes were identified in several published *Frankia*  
134 genomes (Figure 1). Examining the transcriptome of *Frankia alni* ACN14a in (+)N

135 culture (Alloisio *et al.*, 2010), we found that three restriction enzyme genes were highly  
136 expressed: one type I enzyme (FRAAL4992, 92<sup>nd</sup> percentile), one type II enzyme  
137 (FRAAL0249, 91<sup>st</sup> percentile) and one type IV enzyme (FRAAL3325, 85<sup>th</sup> percentile)  
138 (Figure 1). The type IV enzyme was annotated in REBASE as a “Type IV Methyl-  
139 directed restriction enzyme” of the Mrr methyladenine-targeting family. Other *Frankia*  
140 genomes contained likely homologs of this type IV enzyme as well. The genome of  
141 *Frankia casuarinae* CcI3 contained five type IV enzymes, the most of any *Frankia*  
142 genome examined (Figure 1). In the *Frankia* sp. CcI3 transcriptome, type IV Mrr  
143 enzymes were very highly expressed, up to the 96<sup>th</sup> percentile. One of the five enzymes in  
144 CcI3 (Franci3\_2839) was annotated as a Mcr type IV enzyme, which targets 5-  
145 methylcytosine instead (REBASE) and its expression was very low, in only the 18<sup>th</sup>  
146 percentile of genes in the transcriptome. Of the complete genomes examined, only  
147 *Candidatus Frankia datiscaae* Dg1 did not contain any putative type IV restriction genes.

148         A symbiotic transcriptome of *F. alni* ACN14a from root nodules is available in  
149 addition to transcriptomes of free-living culture (Alloisio *et al.*, 2010). In symbiosis with  
150 *Alnus glutinosa* the *mrr* homolog was down-regulated relative to the rest of the  
151 transcriptome, from the 85<sup>th</sup> percentile in culture to an expression level at maximum no  
152 higher than 12 percent of transcriptome genes, while the other restriction enzymes  
153 identified in the *F. alni* genome were not down-regulated in symbiosis (Figure 1). In the  
154 other *Frankia* sp. with a symbiotic transcriptome available, the uncultured cluster II  
155 species *Frankia* sp. Dg1 (Persson *et al.*, 2015), expression of its two restriction enzymes,  
156 neither of which was a Type IV enzyme, occurred at very low levels (Figure 1).

157 Of the actinobacteria outside of genus *Frankia* with published transcriptomes in  
158 pure culture, *Mycobacterium smegmatis*, *Streptomyces avermitilis*, and *Rhodococcus*  
159 *jostii* also highly expressed type IV restriction enzyme genes, in the upper-70<sup>th</sup>  
160 percentiles of their respective transcriptomes (Figure 2). In comparison, the  
161 transcriptomes of proteobacteria and firmicutes examined expressed their corresponding  
162 *mrr* genes around the 50<sup>th</sup> or 60<sup>th</sup> percentiles. One notable exception was the  
163 actinobacterium *Mycobacterium tuberculosis*, which expressed its single gene for a  
164 methyladenine-directed restriction enzyme (Mrr) at extremely low levels, around the 6<sup>th</sup>  
165 percentile in culture.

166 *Genetic Transformation of Frankia alni ACN14a with an Unmethylated Replicating*  
167 *Plasmid*

168 After electroporation *F. alni* cells formed visible hyphae in culture after  
169 approximately ten days (data not shown). When sub-cultured into chloramphenicol-  
170 selective media *F. alni* cultures transformed with unmethylated plasmid pSA3 were able  
171 to grow, whereas those transformed with methylated plasmid were not. When imaged  
172 under 488nm wavelength of excitation in the confocal microscope, green fluorescence  
173 typical of GFP was observed in hyphae as shown in Figure 3. Wild-type *F. alni* hyphae  
174 displayed autofluorescence around 575nm (data not shown), as observed by Hahn *et al.*  
175 (1993), but no fluorescence was observed in the 500-550nm range (Figure 3).

176 *Differential Regulation of egfp Under the Control of the Frankia alni ACN14a nif Cluster*  
177 *Promoter*



178           When grown in (-)N culture, transformants carrying the pIGSAFnif plasmid  
179 showed significant up-regulation of the *egfp* gene conjugated to the *nif* cluster promoter,  
180 approximately 100-fold relative to (+)N culture (Table 1). The *nifH* gene, used as a  
181 positive control for nitrogen fixation, was also significantly up-regulated approximately  
182 9-fold in (-)N media compared with (+)N cultures. Thus, the up-regulation of the *egfp*  
183 gene is consistent with the previous report that plasmid pSA3 is maintained at  
184 approximately 10 copies per cell (Dao and Ferretti, 1985). Expression of the *rpoD*  
185 housekeeping gene, used as a negative control, was not significantly different between  
186 (+)N and (-)N cultures.

187           *F. alni* containing pIGSAFnif grown in (-)N media fluoresced predominantly in  
188 the vesicles (Figure 4). Little to no fluorescence was observed in hyphae. Fluorescence in  
189 the vesicles was present both in the spherical portion as well as in the stalk connecting the  
190 vesicle to the hyphae. No fluorescence was observed in hyphae or vesicles of wild-type *F.*  
191 *alni* grown in (-)N media.

#### 192 *Stability of Plasmid pIGSAF in F. alni ACN14a in the Absence of Selection*

193           In cultures grown without chloramphenicol selection, qPCR analysis did not find  
194 a significant difference in the amount of plasmid relative to genomic DNA after one, two,  
195 or three rounds of sub-culturing (Figure 5). Only after the fourth round of sub-culturing  
196 was a significant decrease from the initial plasmid concentration detected by qPCR  
197 (Figure 5), however, fluorescence throughout the hyphae was still observed even after  
198 four weeks without selection (Figure 6).

#### 199 **Discussion**

200 *Genetic Transformation of Frankia alni ACN14a with an Unmethylated Replicating*  
201 *Plasmid*

202 We have shown that *F. alni* can be stably transformed with an unmethylated  
203 plasmid introduced by electroporation. A homolog of an Mrr Type IV methyladenine-  
204 targeting restriction enzyme was highly expressed in *F. alni* in culture (Figure 1),  
205 suggesting that DNA with methylated adenine bases would be degraded in this organism.  
206 Actinobacteria, especially *Frankia*, expressed Type IV methyl-directed restriction  
207 enzyme genes more highly than proteobacteria and firmicutes (Figure 2), a finding that  
208 correlates with previous reports of higher transformation efficiencies with unmethylated  
209 plasmids in *Corynebacterium* (Ankri *et al.*, 1996) and *Streptomyces spp.* (Molle *et al.*,  
210 1999). Genomes of the majority of actinobacteria are missing homologs of the *dam*  
211 methyltransferase gene (Sachez-Romero *et al.*, 2015) whose product is used to mark  
212 parent DNA strands during replication, and also are missing *mutS* and *mutL* that form a  
213 complex for the removal and repair of mismatched bases on the daughter strand  
214 determined by the methylation of adenine residues (Sachadyn, 2010). Together, these  
215 factors suggest a difference in preference for unmethylated over methylated DNA among  
216 most of the actinobacteria relative to other bacterial phyla.

217 Type IV restriction enzymes have been suggested to have evolved as a counter to  
218 phage methylation systems that themselves evolved to evade host restriction systems by  
219 methylating restriction sites (Westra *et al.*, 2012). Phage genomes adopt the methylation  
220 patterns of their previous host (Loenen and Raleigh, 2014) thus increasing the likelihood  
221 of digestion by actinobacterial enzymes if replicated in a *dam*<sup>+</sup> host. The expression of  
222 type IV restriction enzymes in actinobacteria therefore could represent an adaptation to

223 prevent infection by DNA phages based on the methylation state of their genomes.  
224 Differences in methylation patterns between actinobacteria and other bacterial phyla  
225 (Novella *et al.*, 1996) potentially constitute a barrier to horizontal gene transfer between  
226 these groups, including phage-mediated gene transfer. Of particular interest to the  
227 evolution of root nodule symbioses is the transfer of genes between *Frankia* and the  
228 rhizobia and vice versa. It has been suggested that the *nodA* gene involved in Nod factor  
229 synthesis evolved in the actinobacteria, including some *Frankia*, and was then  
230 horizontally transferred to the rhizobia (Persson *et al.*, 2015). With type IV restriction  
231 enzymes creating a barrier to horizontal transfer into actinobacteria from *dam*<sup>+</sup> bacteria  
232 including proteobacteria, this direction would be more likely than the reverse.

233         However, *F. alni* was observed to down-regulate its type IV *mrr* gene  
234 substantially in symbiosis (Figure 1). As roots contain much lower concentrations of  
235 bacteriophage than the surrounding soil (Ward and Mahler, 1982) this likely represents a  
236 decreased necessity for restriction enzymes as a defense mechanism during symbiosis. A  
237 potential side-effect of this down-regulation, however, is that the barrier to horizontal  
238 transfer posed by type IV enzymes is likely lowered during symbiosis, promoting  
239 horizontal transfer to *Frankia* from other endophytic bacteria.

240         *M. tuberculosis* showed much lower transcription of its annotated type IV  
241 methyladenine targeting restriction enzyme than other actinobacteria. *M. tuberculosis*  
242 expresses an adenine methyltransferase in hypoxic conditions that regulates the  
243 expression of genes likely involved with survival during macrophage infection (Shell *et*  
244 *al.*, 2013). For this reason it is likely that *M. tuberculosis* responds to methylated DNA  
245 differently than other actinobacteria, indeed electrotransformation of *M. tuberculosis* can

246 be readily achieved with methylated plasmids replicated in *E. coli* DH5 $\alpha$  (Pelicic *et al.*,  
247 1997), suggesting that methylated DNA is not digested in *M. tuberculosis*.

248 In this study plasmid pSA3 and its derivatives were capable of replication in *F.*  
249 *alni*. This shows that the broad host-range origin is capable of replication in *Frankia* and  
250 supports its use as a vector for the manipulation of *Frankia* spp. The parent plasmid of  
251 pSA3, pIP501, replicates in a very broad range of bacteria including *Streptomyces*  
252 *lividans* and *E. coli* (Kurenbach *et al.*, 2003) indicating the potential for transformation of  
253 additional actinobacteria with these plasmids.

254 *Differential Regulation of egfp Under the Control of the Frankia alni ACN14a nif Cluster*  
255 *Promoter*

256 The expression of the *egfp* gene of plasmid pIGSAFnif was up-regulated in (-)N  
257 media compared with expression in (+)N media, at proportional levels similar to the  
258 expression of the *nifH* nitrogenase gene (Table 1), demonstrating for the first time that  
259 expression of reporter genes can be manipulated in *Frankia*. This transformation system  
260 resulted in the ability to visualize the expression of nitrogen-fixation genes *in vitro* by  
261 fluorescence microscopy (Figure 4). Interestingly, fluorescence was detected in both the  
262 spherical portion of the vesicle as well as in the stalk that connects to the hyphae,  
263 suggesting that nitrogen fixation genes are expressed in both parts of the vesicle. Previous  
264 studies have shown that the vesicle envelope is deposited around the stalk as well  
265 (Lancelle *et al.*, 1985), supporting the observation that nitrogen fixation occurs in the  
266 stalk.

267           Although the fluorescence observed when *egfp* was expressed under the control of  
268 the *nif* cluster promoter was predominantly in the vesicles, some fluorescence was  
269 occasionally observed in hyphae under nitrogen-fixing conditions, whereas in (+)N media  
270 there was no observable fluorescence (Figure 4). This suggests that there is some  
271 expression of *nif* genes in the hyphae as well as the vesicles induced by nitrogen  
272 limitation. *Frankia spp.* in symbiosis with members of the Casuarinaceae have been  
273 reported to fix nitrogen in hyphae, since no vesicles are differentiated (Murry *et al.*,  
274 1985); this correlated with the formation of a lignified host cell wall in the symbiotic  
275 tissue that likely excludes oxygen (Berg and McDowell, 1987). In liquid culture, there  
276 may be zones of low pO<sub>2</sub> that develop in portions of the *Frankia* hyphal colony where  
277 nitrogen fixation could be induced.

278           *Frankia spp.* in symbiosis have been suggested to be more autonomous than  
279 rhizobial microsymbionts due to their ability to control the flow of oxygen with the  
280 formation of vesicles as well as the expression of more metabolic pathways in the  
281 microsymbiont. These factors allow *Frankia* to be more metabolically independent from  
282 their hosts (Alloisio *et al.*, 2010; Berry *et al.*, 2011). As an example, both *Frankia* and the  
283 rhizobia share a second glutamine synthetase gene, named *glnII*, which is not present in  
284 most other bacteria (Ghoshroy *et al.*, 2010). *glnII* is up-regulated in *F. alni* in symbiosis  
285 relative to nitrogen-replete culture (Alloisio *et al.*, 2010) but not differentially expressed  
286 or required for effective nodule formation by rhizobia such as *Sinorhizobium meliloti*  
287 (Becker *et al.*, 2004; de Bruijn *et al.*, 1989). The development of genetic tools for the  
288 manipulation of *Frankia* will allow further experimentation into these and other

289 distinctive molecular aspects of actinorhizal symbioses, which will, in turn, inform  
290 analyses of the evolution of root nodule symbiosis.

### 291 *Future Directions*

292 Even in the absence of selection plasmid pIGSAF was found to be stable in *F.*  
293 *alni* cultures for at least three weeks (Figure 5) and cultures continued to fluoresce after  
294 at least four weeks (Figure 6). Three to four weeks is sufficient to nodulate *F. alni* hosts  
295 (Alloisio *et al.*, 2010), suggesting that transformants can be used to inoculate plants in  
296 studies of the role of *Frankia* and its interactions with hosts during nodule establishment  
297 and symbiosis. In future this system could be modified using recombination or viral  
298 integrases to anchor genes within the genome. Differential regulation of reporter genes  
299 such as *egfp* can be used to localize the expression of genes identified by genomics and  
300 transcriptomics in specific *Frankia* cell types, in different growth conditions, and in  
301 symbiosis. Replicating plasmids may also enable the study of gene function by  
302 constitutive expression of selected genomic genes, by promoter switching or by knock-  
303 down experiments expressing anti-RNAs to genes of interest (Gillaspie *et al.*, 2009).  
304 Circumventing the natural restriction systems of *Frankia* will also increase the  
305 transformation rate of non-replicating plasmids and enable higher efficiency  
306 recombination for gene knock-out experiments as attempted by Kucho *et al.* (2009).

### 307 **Materials and Methods**

#### 308 *Restriction Enzyme Analysis*

309 Genes annotated as restriction enzymes (Restriction enzyme types I, II, III, or IV)  
310 present in the annotations of all completely sequenced actinobacterial genomes and their

311 annotations were downloaded from the REBASE database (Roberts *et al.*, 2010).  
312 Bacterial transcriptomes used in this study were downloaded from the NCBI GEO  
313 database (Supplementary Table 1). Transcriptomes were chosen based on the following  
314 criteria: 1) transcriptomes were made from pure cultures in log-phase growth, 2)  
315 organism did not have genetic manipulations including mutations or exogenous plasmids,  
316 and 3) cultures did not have additional experimental compounds added including  
317 antibiotics or complex carbon sources. For comparisons between transcriptomes,  
318 expression levels for each gene were calculated as the percent of genes with lower  
319 expression than the gene of interest in each transcriptome.

#### 320 *Culture Conditions*

321 *E. coli* strains DH5 $\alpha$  and GM48 (*dam*- and *dcm*-) were grown in 50ml Difco 1.5%  
322 (w/v) Luria Broth (LB) (Catalog #241420, Becton Dickinson, Franklin Lakes, NJ), pH  
323 6.8, in 250mL flasks at 37°C with shaking at 150 rpm overnight. Plates were made with  
324 1.5% (w/v) Bacto Agar (Becton Dickinson, Franklin Lakes, NJ, catalog #214010) in  
325 1.5% LB, and incubated overnight at 37°C. All media were first sterilized by autoclaving  
326 for 30 minutes at 121°C.

327 *Frankia alni* ACN14a (Normand and Lalonde, 1982) was cultured in 5ml liquid  
328 BAPP media modified from Murry *et al.*, 1984 by the addition of 5mM pyruvate and  
329 5mM MOPS, adjusted to pH 6.7, in sterile 25ml glass test tubes with tetracycline added  
330 to a final concentration of 10 $\mu$ g/ml to prevent contamination. (+)N media included 5mM  
331 ammonium chloride as a nitrogen source whereas (-)N media had no added nitrogen  
332 source. For sub-culturing, hyphae were collected in sterile 2ml microcentrifuge tubes,

333 centrifuged at 10,000rpm for ten minutes in a tabletop microcentrifuge (model #5424,  
334 Eppendorf, Hamburg, Germany), and re-suspended in 1mL fresh BAPP media. Cultures  
335 were then homogenized by passage through a 21G needle six times, then homogenate  
336 equivalent to 50ul packed-cell volume as measured after centrifugation was added to 4ml  
337 of fresh media and incubated at 28°C without shaking. Cultures were routinely sub-  
338 cultured once per week. For selection of transformants, chloramphenicol was added to a  
339 final concentration of 25µg/ml.

#### 340 *Frankia Transformation*

341 *F. alni* cells were grown in culture for one week prior to transformation. Two  
342 milliliters of growth media with hyphae was then pelleted as above and the pellet was re-  
343 suspended in 500µL of ice-cold deionized (DI) water that had been sterilized by  
344 autoclaving. This was repeated two more times, but on the third round of centrifugation  
345 the pellet was re-suspended in 300µL ice-cold sterile 10% glycerol instead. Hyphae in the  
346 cell suspension were then homogenized by passage through a 21G needle twice.

347 300µL of the *F. alni* cell suspension was pipetted into an electroporation cuvette  
348 with a 2mm gap (Molecular BioProducts Catalog #5520, San Diego, CA) and mixed with  
349 10µg of plasmid DNA. The cuvette was then incubated on ice for five minutes.  
350 Electroporation was carried out in a Bio-Rad Gene Pulser™ with Pulse Controller at  
351 2.5kV, 200Ω resistance, and 25µF of capacitance. The cuvette was then immediately  
352 filled with 1ml of ice-cold BAPP media. The cuvette was sealed with Parafilm®  
353 (Pechiney Plastic Packaging, Menasha, WI) and incubated overnight without shaking at  
354 28°C.



355           The following day the *F. alni* culture was removed from the cuvette and added to  
356 3.5ml of sterile BAPP media with tetracycline as above, in a glass test tube. The culture  
357 was incubated at 28°C without shaking until visible hyphae were observed  
358 (approximately 10 days after electroporation). At this point *F. alni* hyphae were sub-  
359 cultured into fresh media as above and then once more one week later. The following  
360 week (two weeks after visible hyphae were observed) the hyphae were sub-cultured again  
361 into BAPP media, this time with chloramphenicol added for selection to a final  
362 concentration of 25µg/ml. Chloramphenicol was chosen as the selective antibiotic  
363 because all *Frankia* strains tested in a study by Tisa *et al.* (1998) were susceptible to it.  
364 This process was repeated the following week for an additional round of selection.

#### 365 *DNA Extraction*

366           Plasmids were purified from *E. coli* using a QIAprep® Spin Miniprep Kit  
367 (Catalog #27106, Qiagen). Two milliliters of overnight cultures were pelleted at  
368 13,000rpm for five minutes and used for extraction. Plasmids were resuspended in EB  
369 buffer (Qiagen) and quantified on a NanoDrop Microvolume Spectrophotometer  
370 (ThermoFisher). Plasmids were further purified by running on a 0.7% agarose gel and  
371 extracted with a Zymoclean Gel DNA Recovery Kit (Catalog #11-300, Genesee  
372 Scientific, San Diego, CA). To synthesize unmethylated plasmids, methylated plasmids  
373 were first extracted from *E. coli* DH5α and transformed into *E. coli* GM48 by heat shock  
374 in CaCl<sub>2</sub> (Sambrook *et al.*, 1989) then cultured and re-extracted as above.

375           *F. alni* DNA extraction was carried out with a CTAB protocol (Feil *et al.*, 2012).  
376 Briefly, cells were pelleted at 10,000rpm for five minutes in a tabletop centrifuge. Cells

377 were then re-suspended in TE buffer and lysed with lysozyme, SDS, Proteinase K, and  
378 CTAB. DNA was extracted with 24:1 chloroform:isoamyl alcohol, and 25:24:1  
379 phenol:chloroform:isoamyl alcohol, washed with isopropanol followed by ethanol,  
380 resuspended in 50ul TE buffer, and quantified by NanoDrop.

### 381 *Plasmid Synthesis*

382 A plasmid designated as pIGSAF was synthesized by ligating a PCR-amplified  
383 fragment containing the *egfp* gene and promoter from plasmid pDiGc (Helaine *et al.*,  
384 2010, Addgene, Cambridge, MA) to plasmid pSA3 (Dao and Ferretti, 1985). Plasmid  
385 pSA3 is a broad host-range replicating plasmid developed as a shuttle vector from pIP501.  
386 The pIP501 origin of replication has been shown to replicate in bacteria of diverse phyla  
387 including Firmicutes, from which it was originally isolated (Horodniceanu *et al.*, 1976),  
388 as well as Actinobacteria and Proteobacteria (Kurenbach *et al.*, 2003). Plasmid pSA3  
389 contains chloramphenicol and tetracycline resistance genes and an *E. coli*-specific origin  
390 of replication for propagation (Dao and Ferretti, 1985).

391 Primers for PCR, listed in Table 2, were designed using NCBI Primer-BLAST  
392 with default settings (Ye *et al.*, 2012). For cloning, primers were designed with linkers  
393 adding target restriction sites onto their 5' ends (Table 2) as well as 4-6 additional bases  
394 to aid in restriction digestion of the ends. A diagram of the addition of linkers by PCR is  
395 shown in Figure 7A. For the synthesis of pIGSAF, primers were designed targeting the  
396 *egfp* coding region as well as the promoter region 200 base pairs upstream. PCR was  
397 performed in a Bio-Rad S1000 Thermal Cycler (Bio-Rad, Hercules, CA) using a Qiagen  
398 Taq PCR kit (catalog #201223). Products were synthesized as in Figure 7A, first

399 amplified for 10 cycles using the annealing temperature of the region corresponding to  
400 the binding site on the target DNA and then an additional 30 cycles using the annealing  
401 temperature of the full primer including the linker (Table 2).

402         The *egfp* fragment was synthesized with SallI and BamHI restriction sites on the 5'  
403 and 3' ends, respectively, with primers EGFP\_SallI\_F and EGFP\_BamHI\_R. The PCR  
404 product and plasmid pSA3 were then digested with both enzymes. The fragments were  
405 purified on an agarose gel as above and then mixed together, denatured by heating for  
406 five minutes at 65°C, and then ligated together by incubation with T4 ligase (catalog  
407 #M0202S, Qiagen) at 16°C overnight. The resulting ligation was transformed into *E. coli*  
408 DH5 $\alpha$  by heat shock (Sambrook *et al.*, 1989). Transformants were selected on LB plates  
409 with chloramphenicol at a final concentration of 25 $\mu$ g/ml. Transformed colonies were  
410 inoculated into liquid LB media with chloramphenicol and cultured as above. Plasmid  
411 pIGSAF was then re-extracted from transformed *E. coli* and its composition was  
412 confirmed by digestion with SallI and BamHI as above.

413         The presence of plasmids pSA3 and pIGSAF electroporated into *F. alni* cultures  
414 was confirmed with PCR. Genomic DNA was extracted and amplified with primers pairs  
415 pSA3\_Cm\_F/pSA3\_CmR for the chloramphenicol resistance gene of plasmid pSA3 and  
416 GFP\_qPCR\_F/GFP\_qPCR\_R for the *egfp* gene of plasmid pIGSAF. PCR products were  
417 separated on an agarose gel and extracted as above, and sequenced by the UCDNA  
418 Sequencing Facility (Davis, CA). Sequences were compared by BLAST against gene  
419 sequences obtained from the original plasmids (Supplementary Table 2).

420 For the differential expression of *egfp* by nitrogen limitation under the control of  
421 the *nif* cluster promoter region of *F. alni* ACN14a, plasmid pIGSAFnif was synthesized.  
422 Ligation of the *nif* cluster promoter region to the coding region of *egfp* was carried out as  
423 outlined in Figure 7B. The *egfp* coding region of pDiGc was amplified without the  
424 upstream promoter region using primers GFP\_CDS\_EcoRI\_F and GFP\_CDS\_Sall\_R  
425 (Table 2). An EcoRI restriction site was added before the start codon and a Sall site was  
426 added 200 bases downstream of the stop codon. Separately, the 300 bases upstream of the  
427 *nif* nitrogenase cluster in the *F. alni* ACN14a genome were amplified with an XbaI site  
428 upstream and an EcoRI site downstream using primers *nif\_promoter\_XbaI\_F* and  
429 *nif\_promoter\_EcoRI\_R* (Table 2). These two PCR products were digested with EcoRI  
430 (catalog #R0101S, New England Biolabs) and ligated together. The ligation product was  
431 then re-amplified by PCR using the *nif* promoter forward primer and the *egfp* reverse  
432 primer. The amplified ligation product and plasmid pSA3 were then each digested with  
433 Sall and XbaI, ligated together, transformed, and selected on chloramphenicol as above.

#### 434 *qPCR Verification of Differential Regulation*

435 Quantifications of gene expression and fold-changes were obtained based on  
436 qPCR amplification. Cultures of transformed cells were grown in 4.0 ml (+)N and (-)N  
437 media in sterile six-well plates (catalog #353046, Corning Inc, Corning, NY) with  
438 shaking at 50rpm at 28°C. After five days, RNA was extracted by bead-beating,  
439 following a protocol adapted from Dietrich *et al.* (2000): *F. alni* hyphae were pelleted at  
440 9000rpm for fifteen minutes, resuspended in 1050ul Buffer RLT (Qiagen), and  
441 transferred to 2ml tubes containing Lysing Matrix B (catalog #6911-100, MP  
442 Biomedicals, Burlingame, CA). Samples were processed with a FastPrep FP120 (Thermo

443 Fisher Scientific, Waltham, MA) for 45 seconds at setting 6.5, then placed on ice for 45  
444 seconds. The processing step was then repeated twice more with cooling on ice between  
445 each step. Supernatants were then transferred to Qiagen RNeasy spin columns and  
446 purified with a Qiagen RNeasy Mini Kit (catalog #74104). RNA was eluted in RNase-  
447 free water and then contaminating DNA was digested with an Invitrogen TURBO DNA-  
448 free Kit (catalog #AM1907, Waltham, MA). Finally, cDNA was synthesized with an  
449 Invitrogen Superscript III Kit (catalog #18080051) with random hexamer primers. qPCR  
450 was performed on a 7500 Fast Real-Time PCR System (Applied Biosystems, Foster City,  
451 CA) with Fast SYBR Green qPCR Master Mix (catalog #4385612, Applied Biosystems)  
452 and primer pairs *rpoD*\_qPCR\_F/*rpoD*\_qPCR\_R, *nifH*\_qPCR\_F/*nifH*\_qPCR\_R,  
453 *infC*\_qPCR\_F/*infC*\_qPCR\_R, and *gfp*\_qPCR\_F/*gfp*\_qPCR\_R (Table 1). *egfp* and *nifH*  
454 were used as experimental targets to confirm differential regulation of *egfp* by nitrogen  
455 limitation; housekeeping gene *infC* was used for normalization as in Alloisio *et al.*  
456 (2010); and sigma factor gene *rpoD* was used as a negative control.

#### 457 *Confocal Microscopy*

458 For visualization of hyphae and GFP fluorescence, *Frankia* cells were grown  
459 either in (+)N or (-)N BAPP medium as above and immobilized on glass slides with a  
460 drop of 3% molten agarose solution: 1.5g molecular biology-grade agarose (catalog  
461 #A9539, Sigma, St. Louis, MO) was dissolved in 50ml DI H<sub>2</sub>O and kept warm in a water  
462 bath at 50°C. Slides were pre-heated on a slide warmer (Fisher) at 50°C. Then 15ul of  
463 *Frankia* hyphae were pipetted onto each slide and covered with 35ul of 3% molten  
464 agarose. A #1.5 coverslip was added to the *Frankia* cells in agarose, which were allowed  
465 to cool to room temperature. The *Frankia* preparations were visualized on a Leica TCS

466 SP8 STED 3X confocal microscope with a 100X oil-immersion objective and a HyD  
467 detector. For fluorescence imaging, samples were excited with 488nm light. The emission  
468 wavelengths were collected from 500-550nm. Images were stored as .lif files from Leica  
469 LAS X and then viewed in FIJI (Schindelin *et al.*, 2012). To visualize hyphal three-  
470 dimensional structure, Z-stack images were taken and then combined using the highest  
471 fluorescent intensity of each pixel (FIJI MAX setting).

#### 472 *Plasmid Stability*

473 In order to test the persistence of a plasmid in transformed *F. alni*, cultures  
474 containing plasmid pIGSAF were grown without selection in non-selective media lacking  
475 chloramphenicol. The cells were first pelleted and re-suspended in fresh BAPP media,  
476 then sub-cultured as above without the addition of chloramphenicol to the media. These  
477 cultures were grown in six-well plates as above for one week. At that time each culture  
478 was pelleted and re-suspended in 500ul fresh BAPP media. This suspension was  
479 homogenized by passage through a 21G needle twice. 250ul of the homogenate was  
480 transferred to fresh BAPP media without chloramphenicol and the remaining 250ul was  
481 used for total genomic DNA extraction as above. This process was repeated once per  
482 week for four weeks. The amount of plasmid in each sample was quantified by qPCR,  
483 performed in duplicate for each of three biological replicates, using *egfp* primers  
484 GFP\_qPCR\_F and GFP\_qPCR\_R (Table 2). Relative fold-change of plasmid between  
485 each time point was calculated using the  $\Delta\Delta C_t$  method (Lee *et al.*, 2006) with the *infC*  
486 gene as a control to normalize the amount of DNA in each sample (amplified with  
487 primers *infC*\_qPCR\_F and *infC*\_qPCR\_R, Table 1). To determine significant changes in  
488 plasmid abundance, two-tailed Welch's t-tests were performed in R on normalized  $\Delta C_t$

489 values calculated ( $p < .05$ ). Cultures grown with selection and without selection for four  
490 weeks were also imaged with fluorescence as above.

#### 491 **Acknowledgements**

492 We thank Dr. Rebecca Parales for providing plasmid pSA3 and Dr. Wolf Heyer  
493 for *E. coli* strain GM48. We also thank Dr. Ingrid Brust-Mascher for technical assistance  
494 with confocal microscopy. IG was supported by a UC Davis Department of Plant  
495 Sciences graduate student research fellowship. Research funding for this project was  
496 provided by UC Davis Henry A. Jastro Research Grants to IG, and by USDA-NIFA-CA-  
497 D-PLS-2173-H (AB).

#### 498 **References**

- 499 1) Alloisio N, Queiroux C, Fournier P, Normand P, Vallenet D, Medigue C,  
500 Yamaura M, Kakoi K, and Kucho K. 2010. The *Frankia alni* symbiotic  
501 transcriptome. *Molecular Plant Microbe Interactions* 23(5): 593-607.
- 502 2) Ankri S, Reyes O, and Leblon G. 1996. Electrotransformation of highly DNA-  
503 restrictive *Corynebacteria* with synthetic DNA. *Plasmid* 35: 62-66.
- 504 3) Appleby CA. 1984. Leghemoglobin and *Rhizobium* respiration. *Ann. Rev. Plant*  
505 *Physiol.* 35: 443-78.
- 506 4) Battenberg K, Potter D, Tabuloc C, Chiu JC, and Berry AM. 2018. Comparative  
507 transcriptomics of two actinorhizal plants and the legume *Medicago truncatula*  
508 support the homology of root nodule symbioses and is congruent with a two-step  
509 process of evolution in the nitrogen-fixing clade of angiosperms. *Frontiers in*  
510 *Plant Science*, in press.

- 511 5) Becker A, Berges H, Krol E, Bruand C, Ruberg S, Capela D, Lauber E, Meilhoc E,  
512 Ampe F, de Bruijn FJ, Fourment J, Francez-Charlot A, Kahn D, Kuster H, Liebe  
513 C, Puhler A, Weidner S, and Batut J. 2004. Global changes in gene expression in  
514 *Sinorhizobium meliloti* 1021 under microoxic and symbiotic conditions.  
515 *Molecular Plant-Microbe Interactions* 17(3): 292-303.
- 516 6) Benson DR and Silvester WB. 1993. Biology of *Frankia* strains, actinomycete  
517 symbionts of actinorhizal plants. *Microbiological Reviews* 57(2): 293-319.
- 518 7) Berg RH and McDowell L. 1987. Endophyte differentiation in *Casuarina*  
519 actinorhizae. *Protoplasma* 136: 104-117.
- 520 8) Berry AM, Harriott OT, Moreau RA, Osman SF, Benson DR. and Jones AD.  
521 1993. Hopanoid lipids compose the Frankia vesicle envelope, presumptive barrier  
522 of oxygen diffusion to nitrogenase. *PNAS* 90(13): 6091-6094.
- 523 9) Berry AM, Mendoza-Herrera A, Guo Y, Hayashi J, Persson T, Barabote R,  
524 Demchenko K, Zhang S, and Pawlowski K. 2011. New perspectives on nodule  
525 nitrogen assimilation in actinorhizal symbioses. *Functional Plant Biology* 38: 645-  
526 652.
- 527 10) Bickhart DM and Benson DR. 2011. Transcriptomes of *Frankia* sp. strain CcI3 in  
528 growth transitions. *BMC Microbiology* 11(1): 1.
- 529 11) Castaneda-Garcia A, Prieto AI, Rodriguez-Beltran J, Alonso N, Cantillon D,  
530 Costas C, Perez-Lago L, Zegeye ED, Plocinski P, Tonjum T, Garcia de Viedma D,  
531 Paget M, Waddell SJ, Rojas AM, Doherty AJ, and Blazquez J. 2017. A non-  
532 canonical mismatch repair pathway in prokaryotes. *Nature Communications* 8:  
533 14246.



- 534 12) Ceremonie H, Debelle F, and Fernandez MP. 1999. Structural and functional  
535 comparison of Frankia root hair deforming factor and rhizobia Nod factor.  
536 Canadian Journal of Botany 77(9): 1293-1301.
- 537 13) Cissoko M, Hocher V, Gherbi H, Gully D, Carre-Mlouko A, Sane S, Pignoly S,  
538 Champion A, Ngom M, Pujic P, Fournier P, Gtari M, Swanson E, Pesce C, Tisa  
539 LS, Sy MO, and Svistoonoof S. 2018. Actinorhizal signaling molecules: *Frankia*  
540 root hair deforming factor shares properties with NIN inducing factor. Front.  
541 Plant Sci. 9: 1494.
- 542 14) Claunch KM, Bush M, Evans CR, Malmquist JA, Hale MC, and McGillivray SM.  
543 2018. Transcriptional profiling of the clpX mutant in *Bacillus anthracis* reveals  
544 regulatory connection with the lrgAB operon. Microbiology 164(4):659-669.
- 545 15) Dao ML and Ferretti JJ. 1985. *Streptococcus-Escherichia coli* shuttle vector pSA3  
546 and its use in the cloning of streptococcal genes. Applied and Environmental  
547 Microbiology 49(1): 115-119.
- 548 16) Daugherty A, Powers KM, Standley MS, Kim CS, and Purdy GE. 2011.  
549 *Mycobacterium smegmatis* RoxY is a repressor of oxyS and contributes to  
550 resistance to oxidative stress and bactericidal ubiquitin-derived peptides. J  
551 Bacteriol 193(24):6824-33.
- 552 17) De Bruijn FJ, Rossbach S, Schneider M, Ratet P, Messmer S, Szeto WW,  
553 Ausubel FM, and Schell J. 1989. *Rhizobium meliloti* 1021 has three differentially  
554 regulated loci involved in glutamine biosynthesis, none of which is essential for  
555 symbiotic nitrogen fixation. Journal of Bacteriology 171(3): 1673-1682.

- 556 18) Dietrich G, Schaible UE, Diehl KD, Mollenkopf H, Wiek S, Hess J, Hagens K,  
557 Kaufmann SH, and Knapp B. 2000. Isolation of RNA from mycobacteria grown  
558 under *in vitro* and *in vivo* conditions. FEMS Microbiol Lett. 186(2): 177-80.
- 559 19) Feil WS, Feil H, and Copeland A. 2012. Bacterial genomic DNA isolation using  
560 CTAB. Joint Genome Institute.
- 561 20) Fu LM and Shinnick TM. 2007. Genome-wide exploration of the drug action of  
562 capreomycin on *Mycobacterium tuberculosis* using Affymetrix oligonucleotide  
563 GeneChips. J Infect 54(3):277-84.
- 564 21) Gage DJ. 2002. Analysis of infection thread development using Gfp- and DsRed-  
565 expressing *Sinorhizobium meliloti*. Journal of Bacteriology 184(24): 7042-7046.
- 566 22) Ghoshroy S, Binder M, Tartar A, and Robertson DL. 2010. Molecular evolution  
567 of glutamine synthetase II: Phylogenetic evidence of a non-endosymbiotic gene  
568 transfer event early in plant evolution. BMC Evolutionary Biology 10:198.
- 569 23) Gillaspie D, Perkins I, Larsen K, McCord A, Pangonis S, Sweger D, Seleem MN,  
570 Sriranganathan N, and Anderson BE. 2009. Plasmid-based system for high-level  
571 gene expression and antisense gene knockdown in *Bartonella henselae*. Applied  
572 and Environmental Microbiology 75(16): 5434-5436.
- 573 24) Griesmann M, Chang Y, Liu X, Song Y, Haberer G, Crook MG, Billault-  
574 Penneteau B, Laouressergues D, Keller J, Imanishi L, Roswanjaya YP, Kohlen W,  
575 Pujic P, Battenberg K, Alloisio N, Liang Y, Hilhorst H, Salgado MG, Hocher V,  
576 Gherbi H, Svistoonoff S, Doyle JJ, He S, Xu Y, Xu S, Qu J, Gao Q, Fang X, Fu Y,  
577 Normand P, Berry AM, Wall LG, Ane J, Pawlowski K, Xu X, Yang H, Spannagl  
578 M, Mayer KFX, Wong GK, Parniske M, Delaux P, and Cheng S. 2018.

- 579 Phylogenomics reveals multiple losses of nitrogen-fixing root nodule symbiosis.  
580 Science 24: eaat1743.
- 581 25) Gutierrez RA. 2012. Systems biology for enhanced plant nitrogen nutrition.  
582 Science 336: 1673-1675.
- 583 26) Hahn D, Amann RI, and Zeyer J. 1993. Whole-cell hybridization of *Frankia*  
584 strains with fluorescence- or digoxigenin-labeled, 16S rRNA-targeted  
585 oligonucleotide probes. Applied and Environmental Microbiology 59(6): 1709-  
586 1716.
- 587 27) Helaine S, Thompson JA, Watson KG, Liu M, Boyle C, and Holden DW. 2010.  
588 Dynamics of intracellular bacterial replication at the single cell level. Proceedings  
589 of the National Academy of Sciences of the United States of America 107(8):  
590 3746-51.
- 591 28) Horodniceanu T, Bouanchaud DH, Bieth G, and Chabbert YA. 1976. R plasmids  
592 in *Streptococcus agalactiae* (Group B). Antimicrobial Agents and Chemotherapy  
593 10(5): 795-801.
- 594 29) Indest KJ, Eberly JO, Hancock DE, Jung CM, Carr MR, and Blakeney GA. 2016.  
595 *Rhodococcus jostii* RHA1 TadA-homolog deletion mutants accumulate less  
596 polyhydroxyalkanoates (PHAs) than the parental strain. The Journal of General  
597 and Applied Microbiology, 62(4), 213-216.
- 598 30) Kucho KI, Kakoi K, Yamaura M, Higashi S, Uchiumi T, and Abe M. 2009.  
599 Transient transformation of *Frankia* by fusion marker genes in liquid culture.  
600 Microbes and Environments 24(3): 231-240.

- 601 31) Kurenbach B, Bohn C, Prabhu J, Abudukerim M, Szewzyk U, and Grohmann E.  
602 2003. Intergeneric transfer of the *Enterococcus faecalis* plasmid pIP501 to  
603 *Escherichia coli* and *Streptomyces lividans* and sequence analysis of its *tra* region.  
604 Plasmid 50(1): 86-93.
- 605 32) Lancelle SA, Torrey JG, Hepler PK, and Callaham DA. 1985. Ultrastructure of  
606 freeze-substituted *Frankia* strain HFPCcI3, the actinomycete isolated from root  
607 nodules of *Casuarina cunninghamiana*. Protoplasma 127: 64-72.
- 608 33) Lee C, Kim J, Shin SG, and Hwang S. 2006. Absolute and relative QPCR  
609 quantification of plasmid copy number in *Escherichia coli*. Journal of  
610 Biotechnology 123: 273-280.
- 611 34) Li L, Guo J, Wen Y, Chen Z, Song Y, and Li J. 2010. Overexpression of ribosome  
612 recycling factor causes increased production of avermectin in *Streptomyces*  
613 *avermitilis* strains. Journal of industrial microbiology & biotechnology, 37(7),  
614 673-679.
- 615 35) Liu M, Durfee T, Cabrera JE, Zhao K, Jin DJ, and Blattner FR. 2005. Global  
616 transcriptional programs reveal a carbon source foraging strategy by *Escherichia*  
617 *coli*. *Journal of Biological Chemistry* 280(16), 15921-15927.
- 618 36) Loenen WAM and Raleigh EA. 2014. The other face of restriction: modification-  
619 dependent enzymes. *Nucleic Acids Research* 42(1): 56-69.
- 620 37) Long SR, Buikema WJ, and Ausubel FM. 1982. Cloning of *Rhizobium meliloti*  
621 nodulation genes by direct complementation of Nod- mutants. *Nature* 298: 485-  
622 488.

- 623 38) Molle V, Palframan WJ, Findlay KC, and Buttner MJ. 1999. WhiD and WhiB,  
624 homologous proteins required for different stages of sporulation in *Streptomyces*  
625 *coelicolor* A3(2). *Journal of Bacteriology* 182(5): 1286-1295.
- 626 39) Murry MA, Fontaine MS, and Torrey JG. 1984. Growth kinetics and nitrogenase  
627 induction in *Frankia* sp. ArI3 grown in batch culture. *Plant and Soil* 78: 61-78.
- 628 40) Murry MA, Zhongze Z, and Torrey JG. 1985. Effect of O<sub>2</sub> on vesicle formation,  
629 acetylene reduction, and O<sub>2</sub>-uptake kinetics in *Frankia* sp. HFPCcI3 isolated from  
630 *Casuarina cunninghamiana*. *Canadian Journal of Microbiology* 31(9): 804-809.
- 631 41) Myers AK and Tisa LS. 2003. Effect of electroporation conditions on cell  
632 viability of *Frankia* EuI1c. *Plant and Soil* 254(1): 83-88.
- 633 42) Normand P and Lalonde M. 1982. Evaluation of *Frankia* isolated from  
634 provenances of two *Alnus* species. *Can. J. Microbiol.* 28: 1133-1142.
- 635 43) Novella IS, Marin I, and Sanchez J. 1996. Restriction analysis of actinomycetes  
636 chromosomal DNA. *Can. J. Microbiol.* 42: 201-206.
- 637 44) Okazaki S, Kaneko T, Sato S, and Saeki K. 2013. Hijacking of leguminous  
638 nodulation signaling by the rhizobial type III secretion system. *PNAS*: 201302360.
- 639 45) Oldroyd GED. 2013. Speak, friend, and enter: signaling systems that promote  
640 beneficial symbiotic associations in plants. *Nature Reviews Microbiology* 11:  
641 252-263.
- 642 46) Pelicic V, Jackson M, Reyrat J, Jacobs WR, Gicquel B, and Guilhot C. 1997.  
643 Efficient allelic exchange and transposon mutagenesis in *Mycobacterium*  
644 *tuberculosis*. *Proc. Natl. Acad. Sci. USA* 94: 10955-10960.

- 645 47) Persson T, Battenberg K, Demina IV, Vigil-Stenman T, Vanden Heuvel B, Pujic  
646 P, Facciotti MT, Wilbanks EG, O'Brien A, Fournier P, Hernandez MAC, Herrera  
647 AM, Medigue C, Normand P, Pawlowski K, and Berry AM. 2015. *Candidatus*  
648 *Frankia datisciae* Dg1, the actinobacterial microsymbiont of *Datisca glomerata*,  
649 expresses the canonical *nod* genes *nodABC* in symbiosis with its host plant. PLoS  
650 One 10(5): e0127630.
- 651 48) Roberts RJ, Vincze T, Posfai J, and Macelis D. 2009. REBASE-a database for  
652 DNA restriction and modification: enzymes, genes, and genomes. Nucleic Acids  
653 Research 38(suppl\_1): D234-D236.
- 654 49) Sachadyn P. 2010. Conservation and diversity of MutS proteins. Mutation  
655 Research 694: 20-30.
- 656 50) Sambrook J, Fritsch EF, and Maniatis T. 1989. Molecular Cloning: A Laboratory  
657 Manual. Second Edition. Cold Spring Harbor Laboratory Press.
- 658 51) Sanchez-Romero MA, Cota I, and Casadesus J. 2015. DNA methylation in  
659 bacteria: from the methyl group to the methylome. Current Opinion in  
660 Microbiology 25: 9-16.
- 661 52) Schindelin J, Arganda-Carreras I, Frise E, Kaynig V, Longair M, Pietzsch T,  
662 Preibisch S, Rueden C, Saalfeld S, Schmid B, Tinevez J, White DJ, Hartenstein V,  
663 Eliceiri K, Tomancak P, and Cardona A. 2012. Fiji: an open-source platform for  
664 biological-image analysis. Nature Methods 9: 676-682.
- 665 53) Shell SS, Prestwich EG, Baek S, Shah RR, Sasseti CM, Dedon PC, and Fortune  
666 SM. 2013. DNA methylation impacts gene expression and ensures hypoxic  
667 survival of *Mycobacterium tuberculosis*. PLoS Pathogens 9(7): e1003419.

- 668 54) Simonet P, Normand P, Hirsch AM, and Akkermans ADL. 1990. The genetics of  
669 the *Frankia*-Actinorhizal symbiosis. Molecular Biology of Symbiotic Nitrogen  
670 Fixation. Edited by Peter M. Gresshoff. 77-109.
- 671 55) Spaepen S, Das F, Luyten E, Michiels J, and Vanderleyden J. 2009. Indole-3-  
672 acetic acid-regulated genes in *Rhizobium etli* CNPAF512. FEMS Microbiology  
673 Letters 291(2): 195-200.
- 674 56) Soltis DE, Soltis PS, Morgan DR, Swensen SM, Mullin BC, Dowd JM, and  
675 Martin PG. 1995. Chloroplast gene sequence data suggest a single origin of the  
676 predisposition for symbiotic nitrogen fixation in angiosperms. Proc. Natl. Acad.  
677 Sci. USA 92: 2647-2651.
- 678 57) Tisa LS, Chval MS, Krumholz GD, and Richards J. 1998. Antibiotic resistance  
679 patterns of *Frankia* strains. Can. J. Bot. 77: 1257-1260.
- 680 58) Ward RL and Mahler RJ. 1982. Uptake of bacteriophage f2 through plant roots.  
681 Applied and Environmental Microbiology 43(5): 1098-1103.
- 682 59) Werner GDA, Cornwell WK, Sprent JI, Kattge J, and Kiers ET. 2014. A single  
683 evolutionary innovation drives the deep evolution of symbiotic N<sub>2</sub>-fixation in  
684 angiosperms. Nature Communications 5: 4087.
- 685 60) Westra ER, Swarts DC, Staals RHJ, Jore MM, Brouns SJJ, and van der Oost J.  
686 2012. The CRISPRs, they are a-changin': how prokaryotes generate adaptive  
687 immunity. Annual Review of Genetics 46:311-339.
- 688 61) Ye J, Coulouris G, Zaretskaya I, Cutcutache I, Rozen S, and Madden TL. 2012.  
689 Primer-BLAST: A tool to design target-specific primers for polymerase chain  
690 reaction. BMC Bioinformatics 13(134): 1-11.

691 62) Zhang X, Chen W, Zhang Y, Jiang L, Chen Z, Wen Y, and Li J. 2012. Deletion of  
692 *ku* homologs increases gene targeting frequency in *Streptomyces avermitilis*.  
693 Journal of Industrial Microbiology and Biotechnology 39(6): 917-925.

#### 694 **Figures and Tables**

695 **Figure 1** Restriction enzymes annotated in the *Frankia* genomes and expression levels of  
696 each gene in the transcriptome in culture when available (Alloisio *et al.*, 2010 and  
697 Bickhart and Benson, 2011). NA: Transcriptome not available.

698 **Figure 2** Restriction enzymes annotated in the genomes of *Frankia*, other actinobacteria,  
699 and proteobacteria and firmicutes for comparison. For each, expression levels for  
700 available transcriptomes growing in pure culture are provided.

701 **Figure 3** Transformation of *Frankia alni* ACN14a with a plasmid expressing *egfp*. Top:  
702 Wild-type *F. alni* ACN14a control. Bottom: Transformed *F. alni* ACN14a with plasmid  
703 pIGSAF. Images were obtained on a confocal microscope with both brightfield and  
704 epifluorescence and then overlaid.

705 **Figure 4** Transformation of *Frankia alni* ACN14a with a plasmid expressing *egfp* under  
706 the control of the *nif* cluster promoter region from the *F. alni* genome. Transformed  
707 cultures were grown in both (+)N and (-)N media to compare fluorescence with and  
708 without nitrogen fixation. Top: *F. alni* ACN14a transformed with plasmid pIGSAFnif  
709 grown in (+)N media. Middle: *F. alni* ACN14a with plasmid pIGSAFnif grown in (-)N  
710 media. Bottom: Close-up of a vesicle showing fluorescence in the stalk. Images were  
711 obtained on a confocal microscope with both brightfield and epifluorescence and then  
712 overlaid.



713 **Figure 5** Maintenance of plasmid pIGSAF in *Frankia alni* in culture without  
714 chloramphenicol selection over the course of four weeks. Each week the culture was sub-  
715 cultured into fresh media and genomic DNA was extracted to measure relative plasmid  
716 concentrations via qPCR. Groups ‘a’ and ‘b’ indicate time points that are not significantly  
717 different from each other ( $p < .05$ ).

718 **Figure 6** Fluorescence of a *Frankia alni* hyphal colony transformed with plasmid  
719 pIGSAF grown with chloramphenicol selection (top) and without selection for four weeks  
720 (bottom).

721 **Figure 7** PCR amplification and digestion and ligation overview for plasmid synthesis  
722 used in this study. Linkers including restriction sites are colored red, blue, or green. A)  
723 PCR products for cloning were amplified by amplification at a lower initial temperature  
724 to allow the incorporation of additional restriction sites on the 5’ end of the primers  
725 (shown in red and blue). The annealing temperature was then increased to amplify full-  
726 length products with the added restriction sites. B) Addition of the *F. alni* ACN14a *nif*  
727 cluster promoter region to the *egfp* coding sequence. Both the promoter region and *egfp*  
728 coding sequence were amplified with EcoRI sites (blue). These were then digested and  
729 ligated together followed by amplification of the ligation product. Restriction sites on the  
730 ends (red and green) were digested, allowing incorporation of the *nif* promoter:*egfp*  
731 product into the digested plasmid.

732 **Table 1** qPCR verification of differential regulation of *egfp* in (+)N and (-)N media.  
733 qPCR tested fold-change of *egfp* as well as *nifH* as a nitrogen-fixation positive control  
734 and *rpoD* as a housekeeping negative control.

735 **Table 2** Primers designed for this study. Restriction sites added to primers by linker PCR  
736 for use in cloning are bolded in the primer sequence and annealing temperatures are listed  
737 both for the initial reaction (“Without Linker”) and the main amplification phase of the  
738 PCR (“Full Sequence”).

### 739 **Supplementary Figures and Tables**

740 **Supplementary Table 1** List of genomes and transcriptomes used in this study.

741 Transcriptomes are listed with their GEO accession number and original reference.

742 **Supplementary Table 2** Sequences from PCR products of *Frankia alni* transformants  
743 corresponding to the chloramphenicol resistance gene (*camr*) from pSA3 and *egfp* gene  
744 of plasmid plasmid pIGSAF and pDiGc.

| Gene ID                                               | Type | Enzyme Percentile (Culture) | Percentile (Symbiosis) |
|-------------------------------------------------------|------|-----------------------------|------------------------|
| <b><i>Frankia alni</i> ACN14a</b>                     |      |                             |                        |
| FRAAL1375                                             | I    | 29.2                        | 12.1                   |
| FRAAL4992                                             | I    | 92.6                        | 95.8                   |
| FRAAL0249                                             | II   | 91.2                        | 92.8                   |
| FRAAL3915                                             | II   | 14.7                        | 14.7                   |
| FRAAL6331                                             | II   | 28.6                        | 48.9                   |
| FRAAL3325                                             | IV   | 85.3                        | 12.8                   |
| <b><i>Frankia</i> sp. Eul1c</b>                       |      |                             |                        |
| FraEul1c_5666                                         | II   | NA                          | NA                     |
| FraEul1c_7150                                         | II   | NA                          | NA                     |
| <b><i>Frankia</i> sp. Ccl3</b>                        |      |                             |                        |
| Francci3_0194                                         | I    | 88.8                        | NA                     |
| Francci3_4011                                         | I    | 41.6                        | NA                     |
| Francci3_1102                                         | II   | 83.6                        | NA                     |
| Francci3_2728                                         | II   | 83.2                        | NA                     |
| Francci3_2953                                         | II   | 77.1                        | NA                     |
| Francci3_0156                                         | IV   | 65.0                        | NA                     |
| Francci3_1123                                         | IV   | 73.7                        | NA                     |
| Francci3_1132                                         | IV   | 96.0                        | NA                     |
| Francci3_2839                                         | IV   | 18.7                        | NA                     |
| Francci3_2840                                         | IV   | 37.3                        | NA                     |
| <b><i>Frankia</i> sp. EAN1pec</b>                     |      |                             |                        |
| Franean1_5336                                         | II   | NA                          | NA                     |
| Franean1_5421                                         | II   | NA                          | NA                     |
| Franean1_6769                                         | II   | NA                          | NA                     |
| Franean1_2349                                         | IV   | NA                          | NA                     |
| Franean1_7063                                         | IV   | NA                          | NA                     |
| <b><i>Candidatus</i> <i>Frankia datiscaae</i> Dg1</b> |      |                             |                        |
| FsymDg_3166                                           | I    | NA                          | 43.0                   |
| FsymDg_0581                                           | II   | NA                          | 57.4                   |

Scale (Percentile)

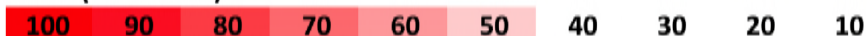

**Figure 1** Restriction enzymes annotated in the *Frankia* genomes and expression levels of each gene in the transcriptome in culture when available (Alloisio *et al.*, 2010 and Bickhart and Benson, 2011). NA: Transcriptome not available.

| Organism                                | Phylum         | Gene ID       | Percentile (Culture) |
|-----------------------------------------|----------------|---------------|----------------------|
| <i>Frankia alni</i> ACN14a              | Actinobacteria | FRAAL3325     | 85.3                 |
| <i>Frankia</i> sp. Ccl3                 | Actinobacteria | FranCcl3_1132 | 96.1                 |
|                                         |                | FranCcl3_1123 | 73.7                 |
|                                         |                | FranCcl3_0156 | 65                   |
| <i>Mycobacterium smegmatis</i> MC2 155  | Actinobacteria | MSMEG_1765    | 79.8                 |
| <i>Mycobacterium tuberculosis</i> H37Rv | Actinobacteria | Rv2528c       | 5.7                  |
| <i>Streptomyces avermitilis</i> MA-4680 | Actinobacteria | SAV_5202      | 77.4                 |
| <i>Rhodococcus jostii</i> RHA1          | Actinobacteria | RHA1_ro05906  | 79.9                 |
| <i>Escherichia coli</i> K-12 MG1655     | Proteobacteria | ECK4341       | 63.1                 |
| <i>Bacillus anthracis</i> Sterne        | Firmicutes     | BAS2162       | 8.8                  |
|                                         |                | BAS2317       | 50.7                 |

Scale (Percentile)

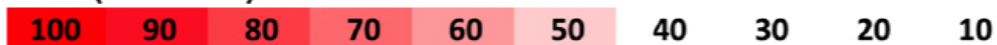

**Figure 2** Restriction enzymes annotated in the genomes of *Frankia*, other actinobacteria, and proteobacteria and firmicutes for comparison. For each, expression levels for available transcriptomes growing in pure culture are provided.

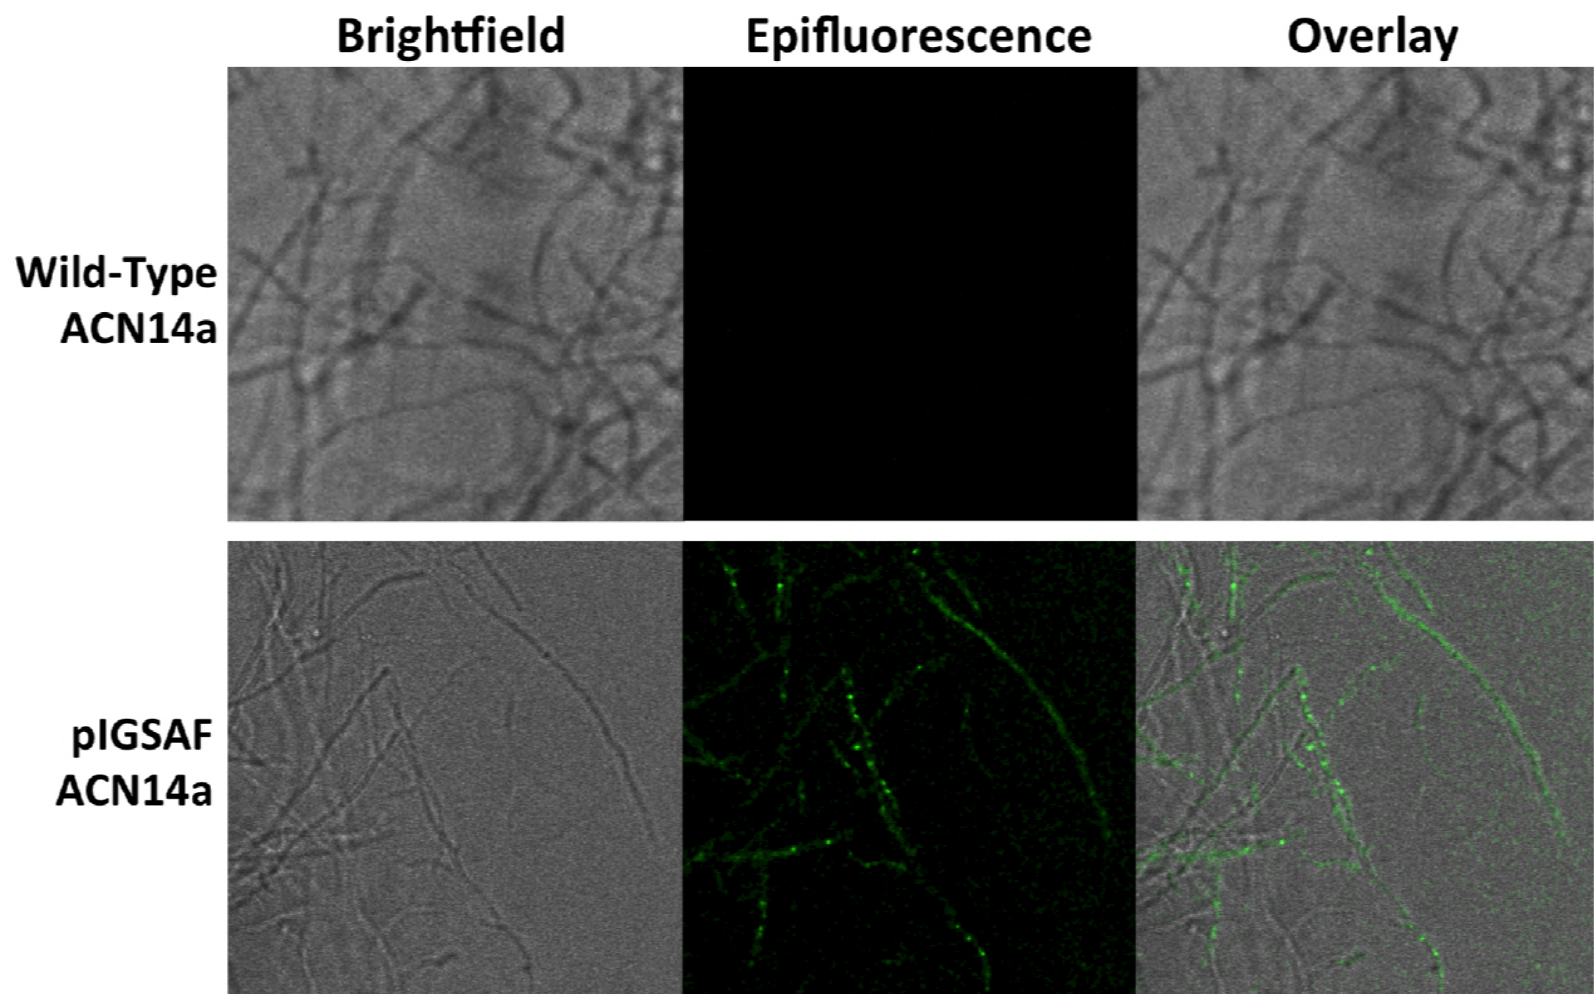

**Figure 3** Transformation of *Frankia alni* ACN14a with a plasmid expressing *egfp*. Top: Wild-type *F. alni* ACN14a control. Bottom: Transformed *F. alni* ACN14a with plasmid pIGSAF. Images were obtained on a confocal microscope with both brightfield and epifluorescence and then overlaid.

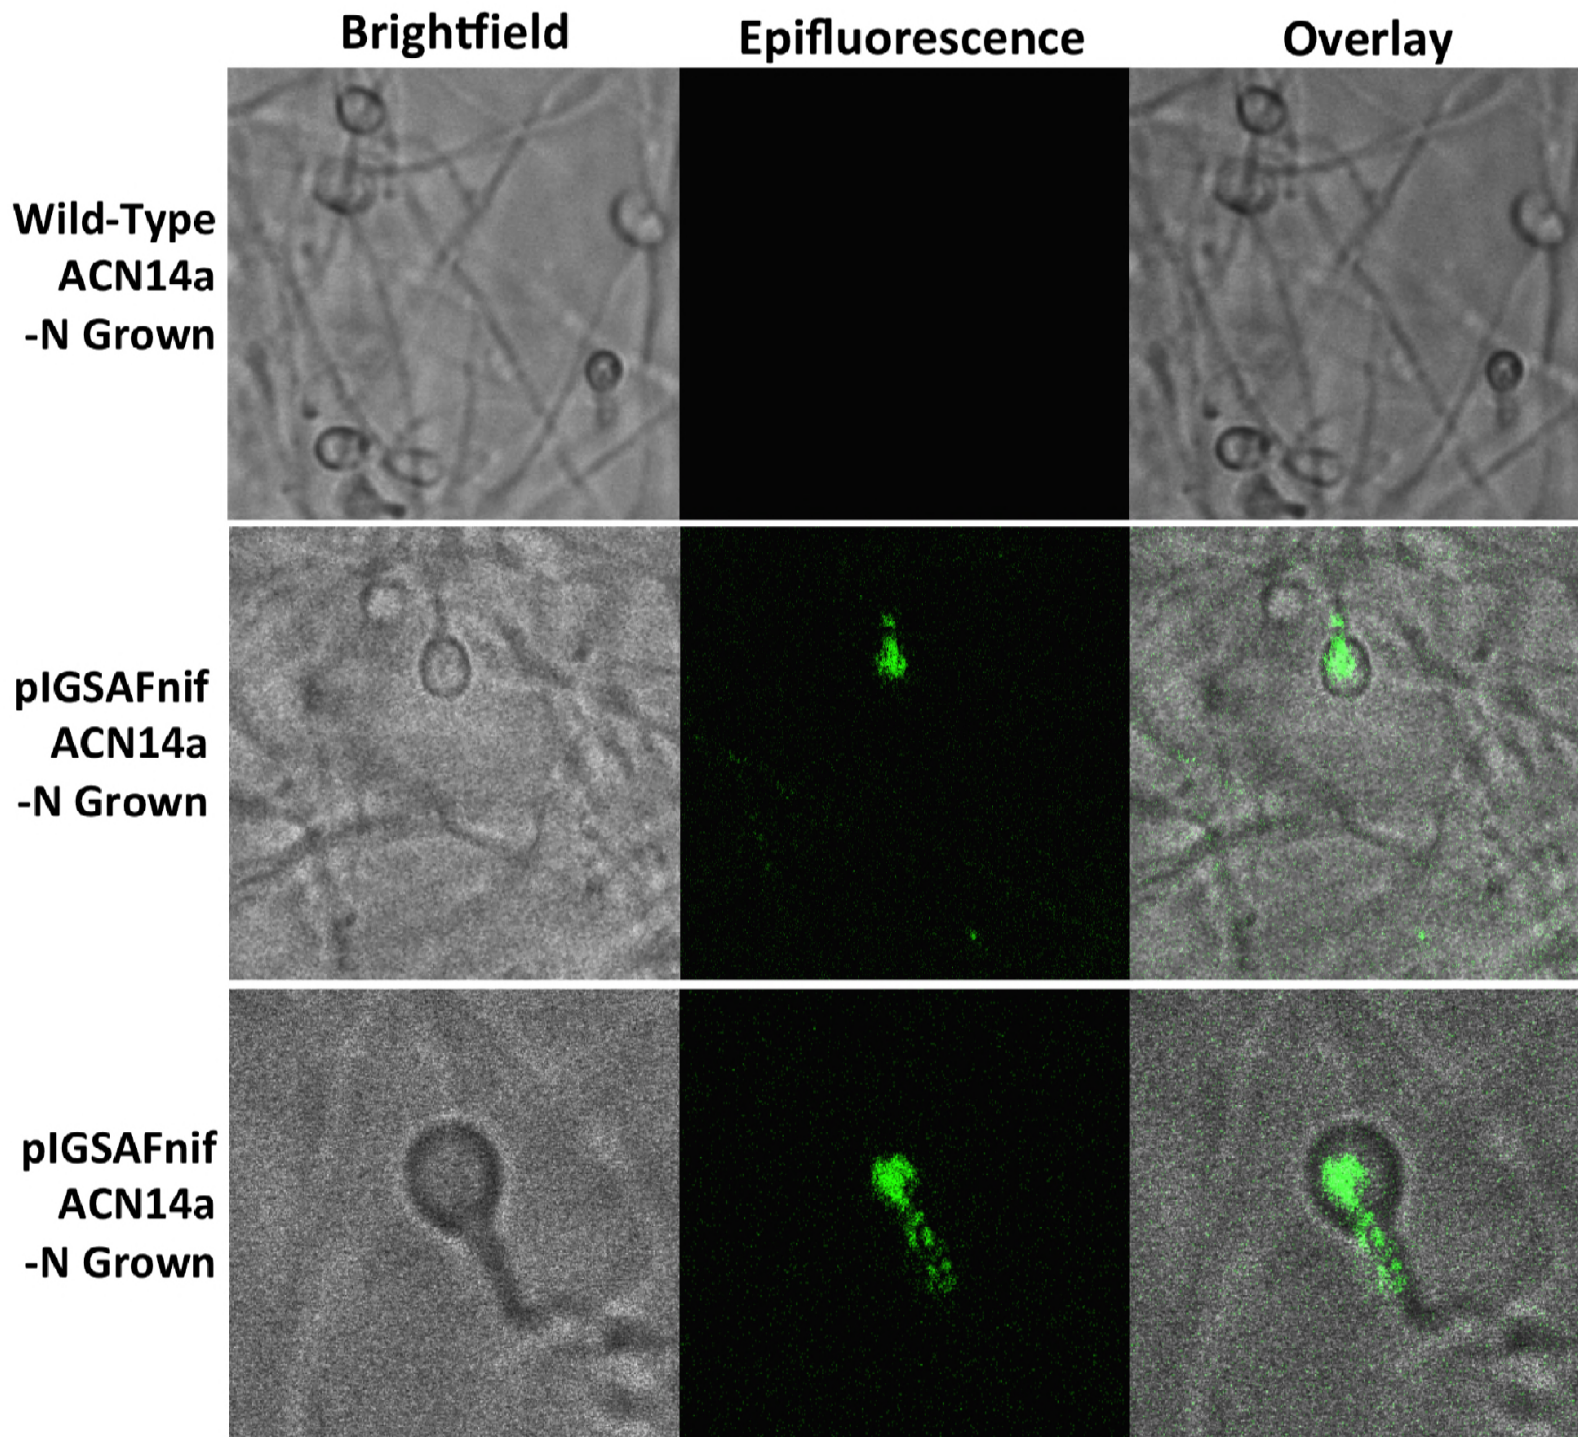

**Figure 4** Transformation of *Frankia alni* ACN14a with a plasmid expressing *egfp* under the control of the *nif* cluster promoter region from the *F. alni* genome. Transformed cultures were grown in both (+)N and (-)N media to compare fluorescence with and without nitrogen fixation. Top: *F. alni* ACN14a transformed with plasmid pIGSAFnif grown in (+)N media. Middle: *F. alni* ACN14a with plasmid pIGSAFnif grown in (-)N media. Bottom: Close-up of a vesicle showing fluorescence in the stalk. Images were obtained on a confocal microscope with both brightfield and epifluorescence and then overlaid.

### Maintenance of plasmid pIGSAF in *Frankia alni* ACN14a culture in the absence of chloramphenicol selection

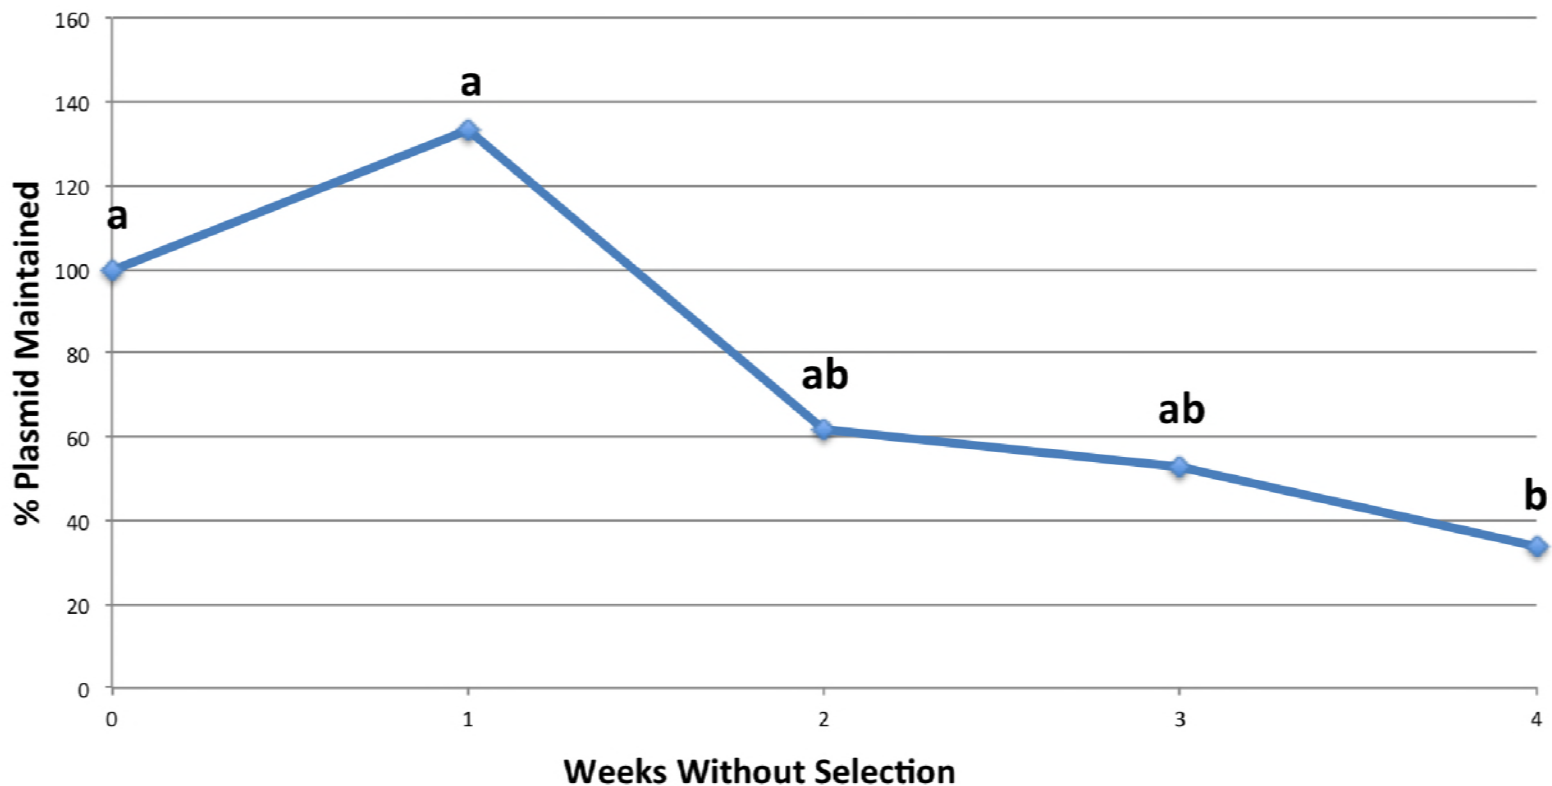

**Figure 5** Maintenance of plasmid pIGSAF in *Frankia alni* in culture without chloramphenicol selection over the course of four weeks. Each week the culture was sub-cultured into fresh media and genomic DNA was extracted to measure relative plasmid concentrations via qPCR. Groups 'a' and 'b' indicate time points that are not significantly different from each other ( $p < .05$ ).

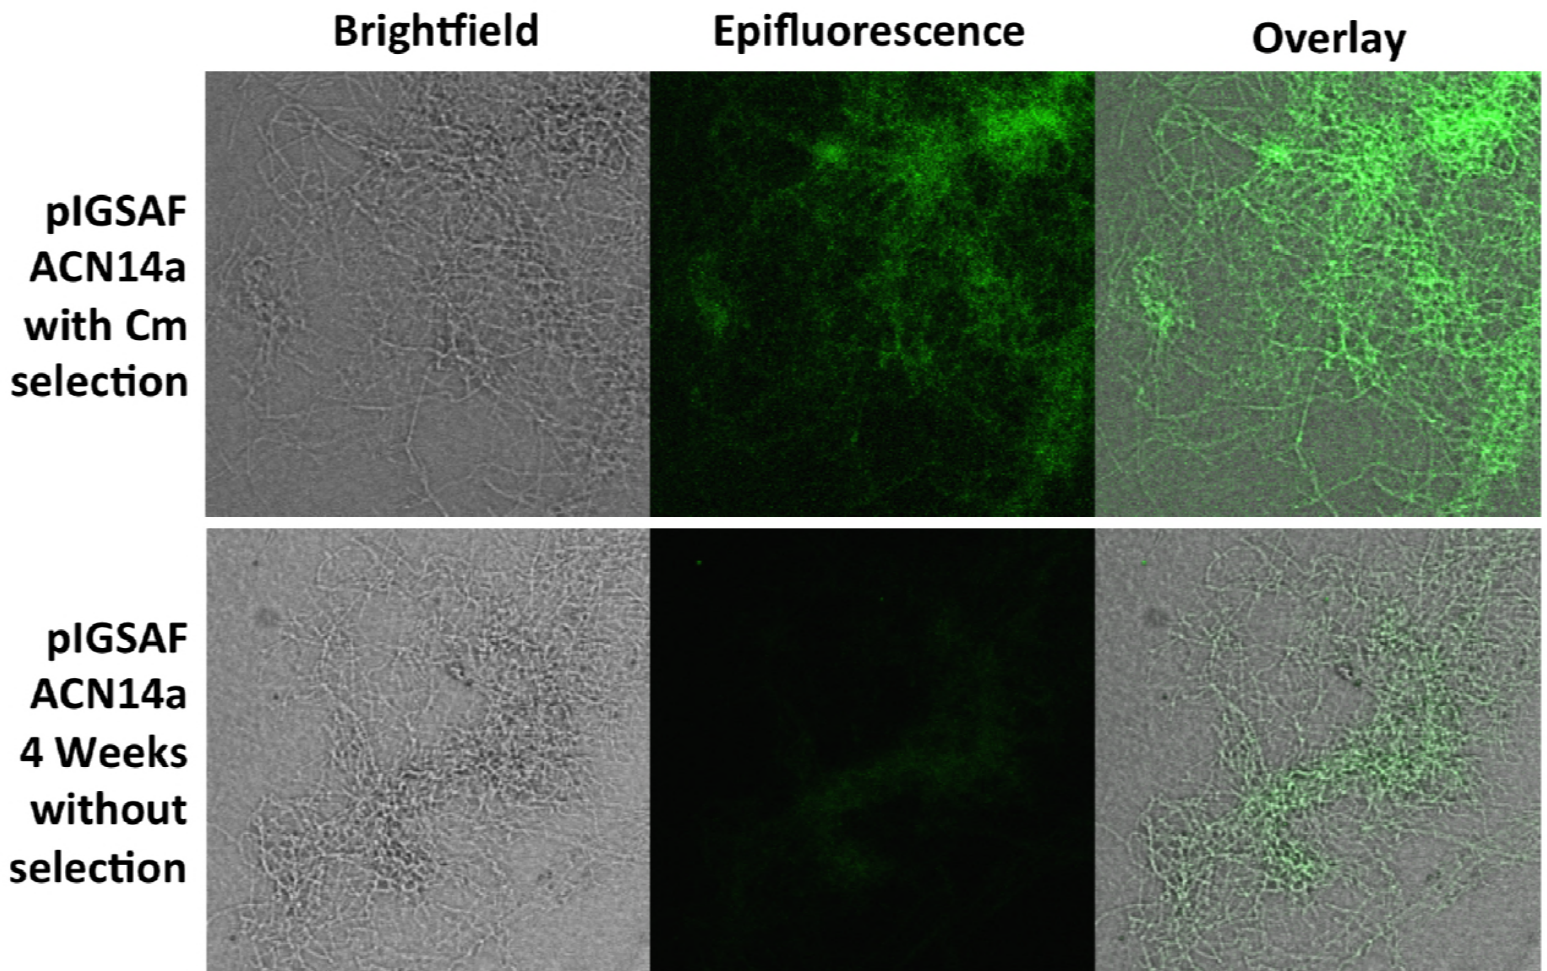

**Figure 6** Fluorescence of a *Frankia alni* hyphal colony transformed with plasmid pIGSAF grown with chloramphenicol selection (top) and without selection for four weeks (bottom).



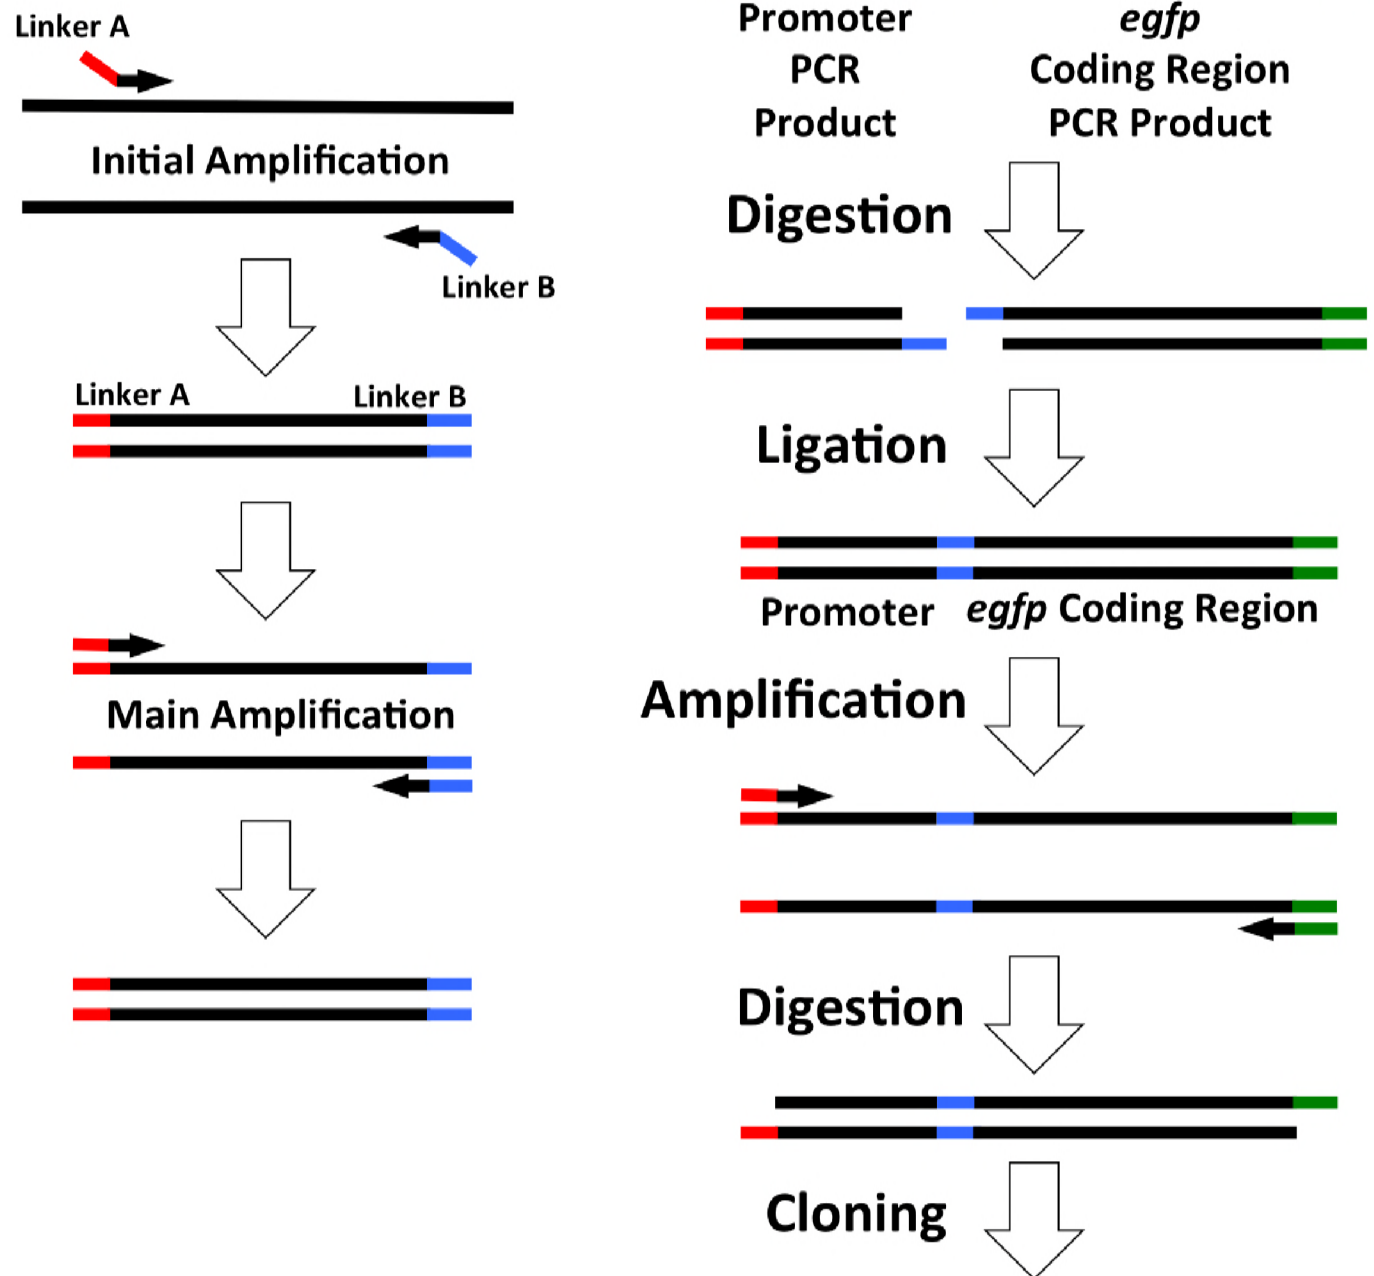

**Figure 7** PCR amplification and digestion and ligation overview for plasmid synthesis used in this study. Linkers including restriction sites are colored red, blue, or green. A) PCR products for cloning were amplified by amplification at a lower initial temperature to allow the incorporation of additional restriction sites on the 5' end of the primers (shown in red and blue). The annealing temperature was then increased to amplify full-length products with the added restriction sites. B) Addition of the *F. alni* ACN14a *nif* cluster promoter region to the *egfp* coding sequence. Both the promoter region and *egfp* coding sequence were amplified with EcoRI sites (blue). These were then digested and ligated together followed by amplification of the ligation product. Restriction sites on the ends (red and green) were digested, allowing incorporation of the *nif* promoter:*egfp* product into the digested plasmid.

| <b>Gene</b>     | <b>Role</b>       | <b>Fold Change (-N/+N)</b> | <b>p-value</b> |
|-----------------|-------------------|----------------------------|----------------|
| <i>nif:egfp</i> | Fluorescence      | 101.6                      | <.05           |
| <i>nifH</i>     | Nitrogen fixation | 8.5                        | <.05           |
| <i>rpoD</i>     | Housekeeping      | 0.4                        | >.05           |

| Primer Name          | Linker Restriction Site | Sequence                        | Melting Temperatures (°C) |                |
|----------------------|-------------------------|---------------------------------|---------------------------|----------------|
|                      |                         |                                 | Full Primer               | Without Linker |
| pSA3_Cm_F            | -                       | TATTCAGGCGTAGCACCAGG            | 60.5                      | -              |
| pSA3_Cm_R            | -                       | TGTTGATACCGGGAAGCCCT            | 60.5                      | -              |
| EGFP_SalI_F          | SalI                    | TAAGTCGACGAGCCGAAGCATAAACAGCG   | 71.9                      | 60.5           |
| EGFP_BamHI_R         | BamHI                   | ATTAAGGATCCGTACCGGCATAACCAAGCCT | 72.1                      | 60.5           |
| nif_promoter_XbaI_F  | XbaI                    | AAGTTTCTAGAGTGCTCCTATTCGTTCCGGC | 70.8                      | 59.5           |
| nif_promoter_EcoRI_R | EcoRI                   | AAGAAGAATTCTTGCTCCGGGACTGAAGAC  | 70.8                      | 59.5           |
| GFP_CDS_EcoRI_F      | EcoRI                   | AAGCTGAATTCATGAGTAAAGGAGAAGAAC  | 66.7                      | 50.9           |
| GFP_CDS_SalI_R       | SalI                    | AATTCGTCGACTGCCTGACTGCGTTAGCAA  | 72.1                      | 57.5           |
| rpoD_qPCR_F          | -                       | ATGCTGTTCCCTGGACCTCATC          | 61.2                      | -              |
| rpoD_qPCR_R          | -                       | GTGGCGTAGGTCGAGAACTT            | 60.5                      | -              |
| nifH_qPCR_F          | -                       | GCGTACTTCAGGATGCCTCG            | 62.5                      | -              |
| nifH_qPCR_R          | -                       | GACGTTGTGTGTGGTGGGTT            | 60.5                      | -              |
| infC_qPCR_F          | -                       | ACGACGTGACCCTTCTTGGT            | 60.5                      | -              |
| infC_qPCR_R          | -                       | TCGGGAAGCTCGGAAGAAC             | 59.5                      | -              |
| gfp_qPCR_F           | -                       | TGCTTTGCGAGATACCCAGA            | 58.4                      | -              |
| gfp_qPCR_R           | -                       | ACGTGTCTTGTAGTTCCCGTC           | 61.2                      | -              |
